# Supplementary material for: Histamine deficiency aggravates cardiac injury through miR-206/216b-Atg13 axis-mediated autophagic-dependant apoptosis
Source: PubMed Central journal article supplement (PMC5992227; doi:10.1038/s41419-018-0723-6), 2018-06-07

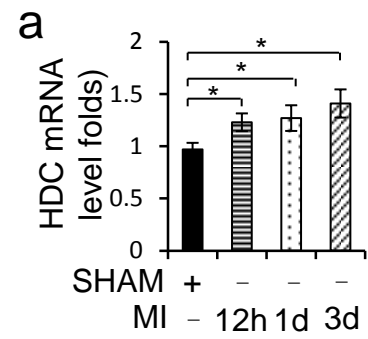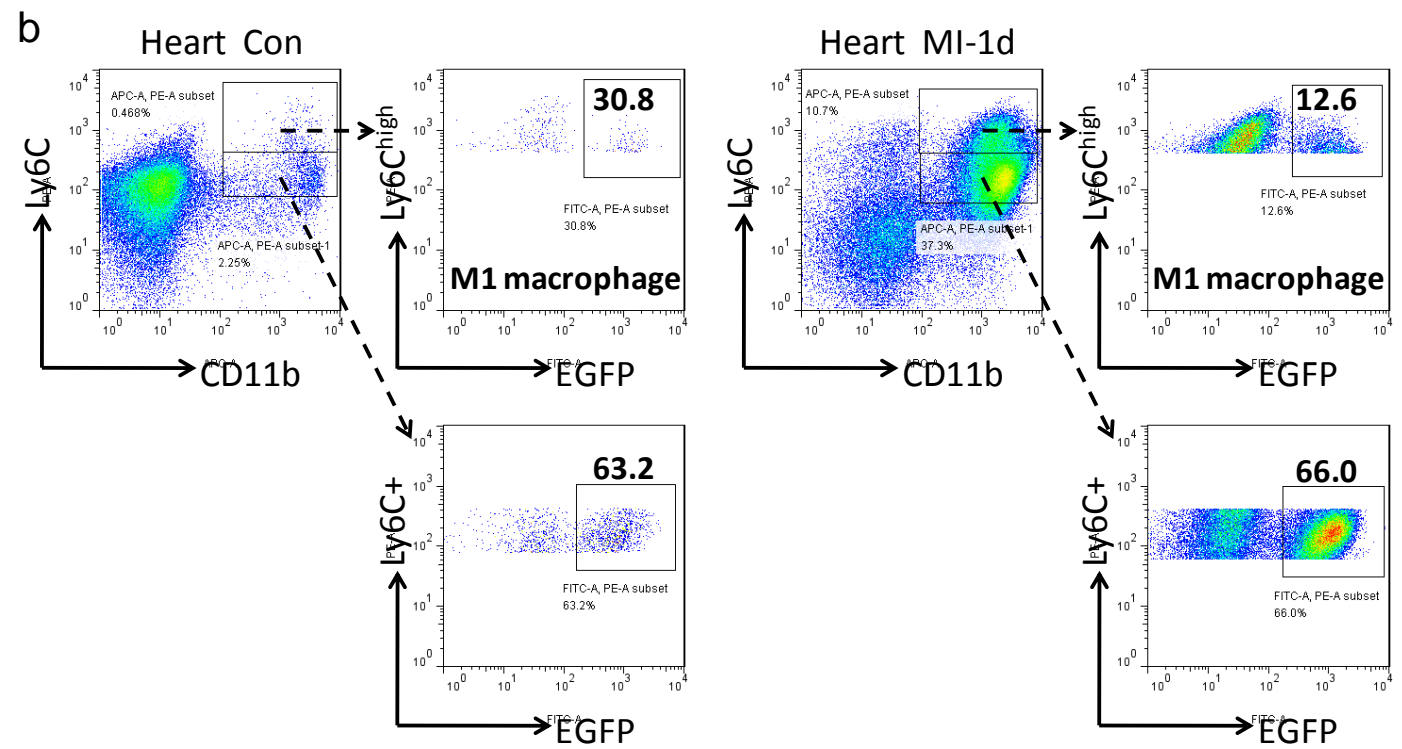

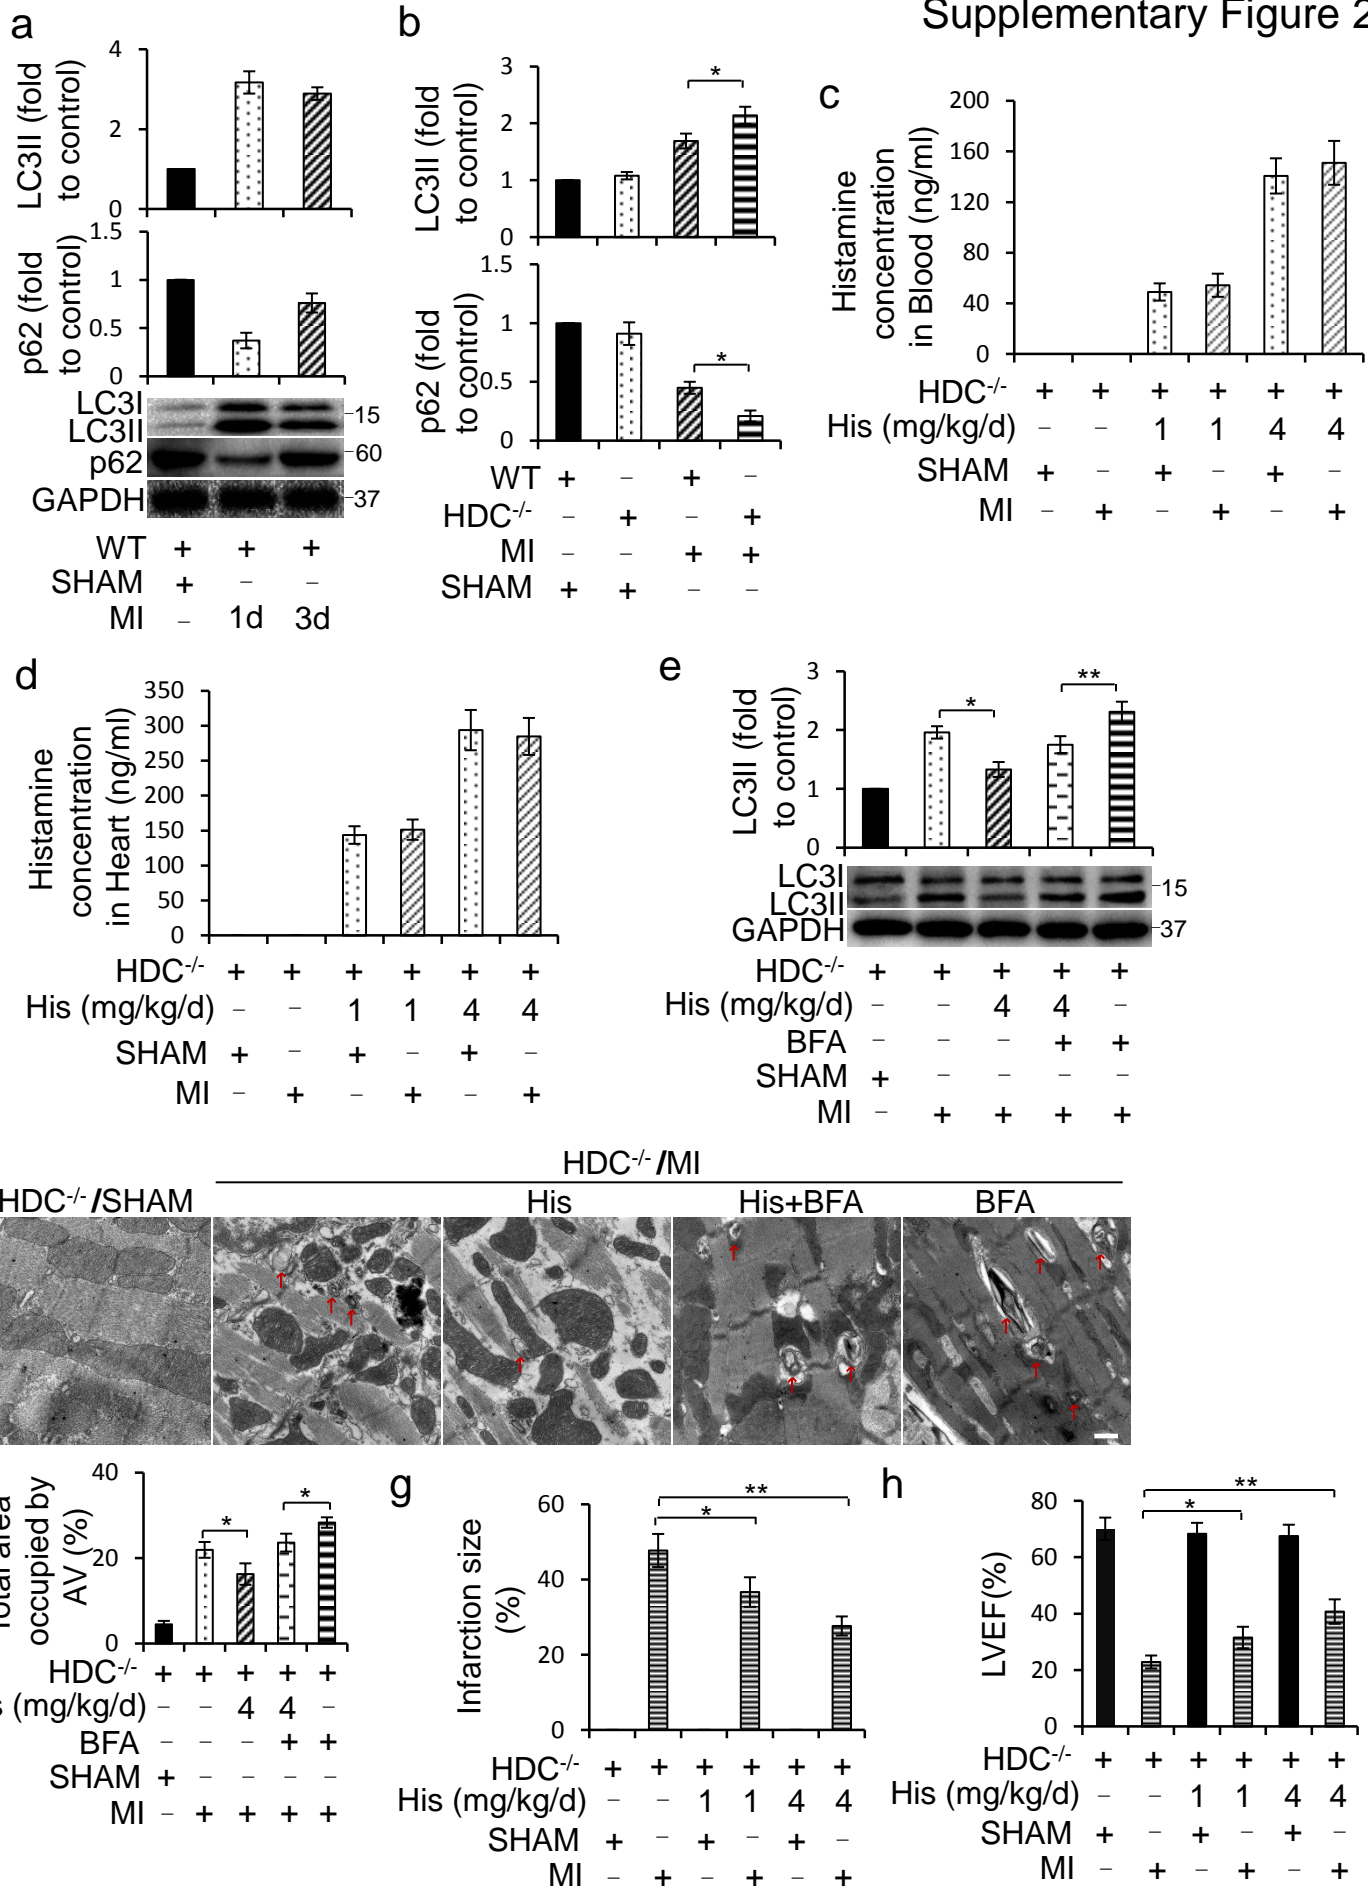

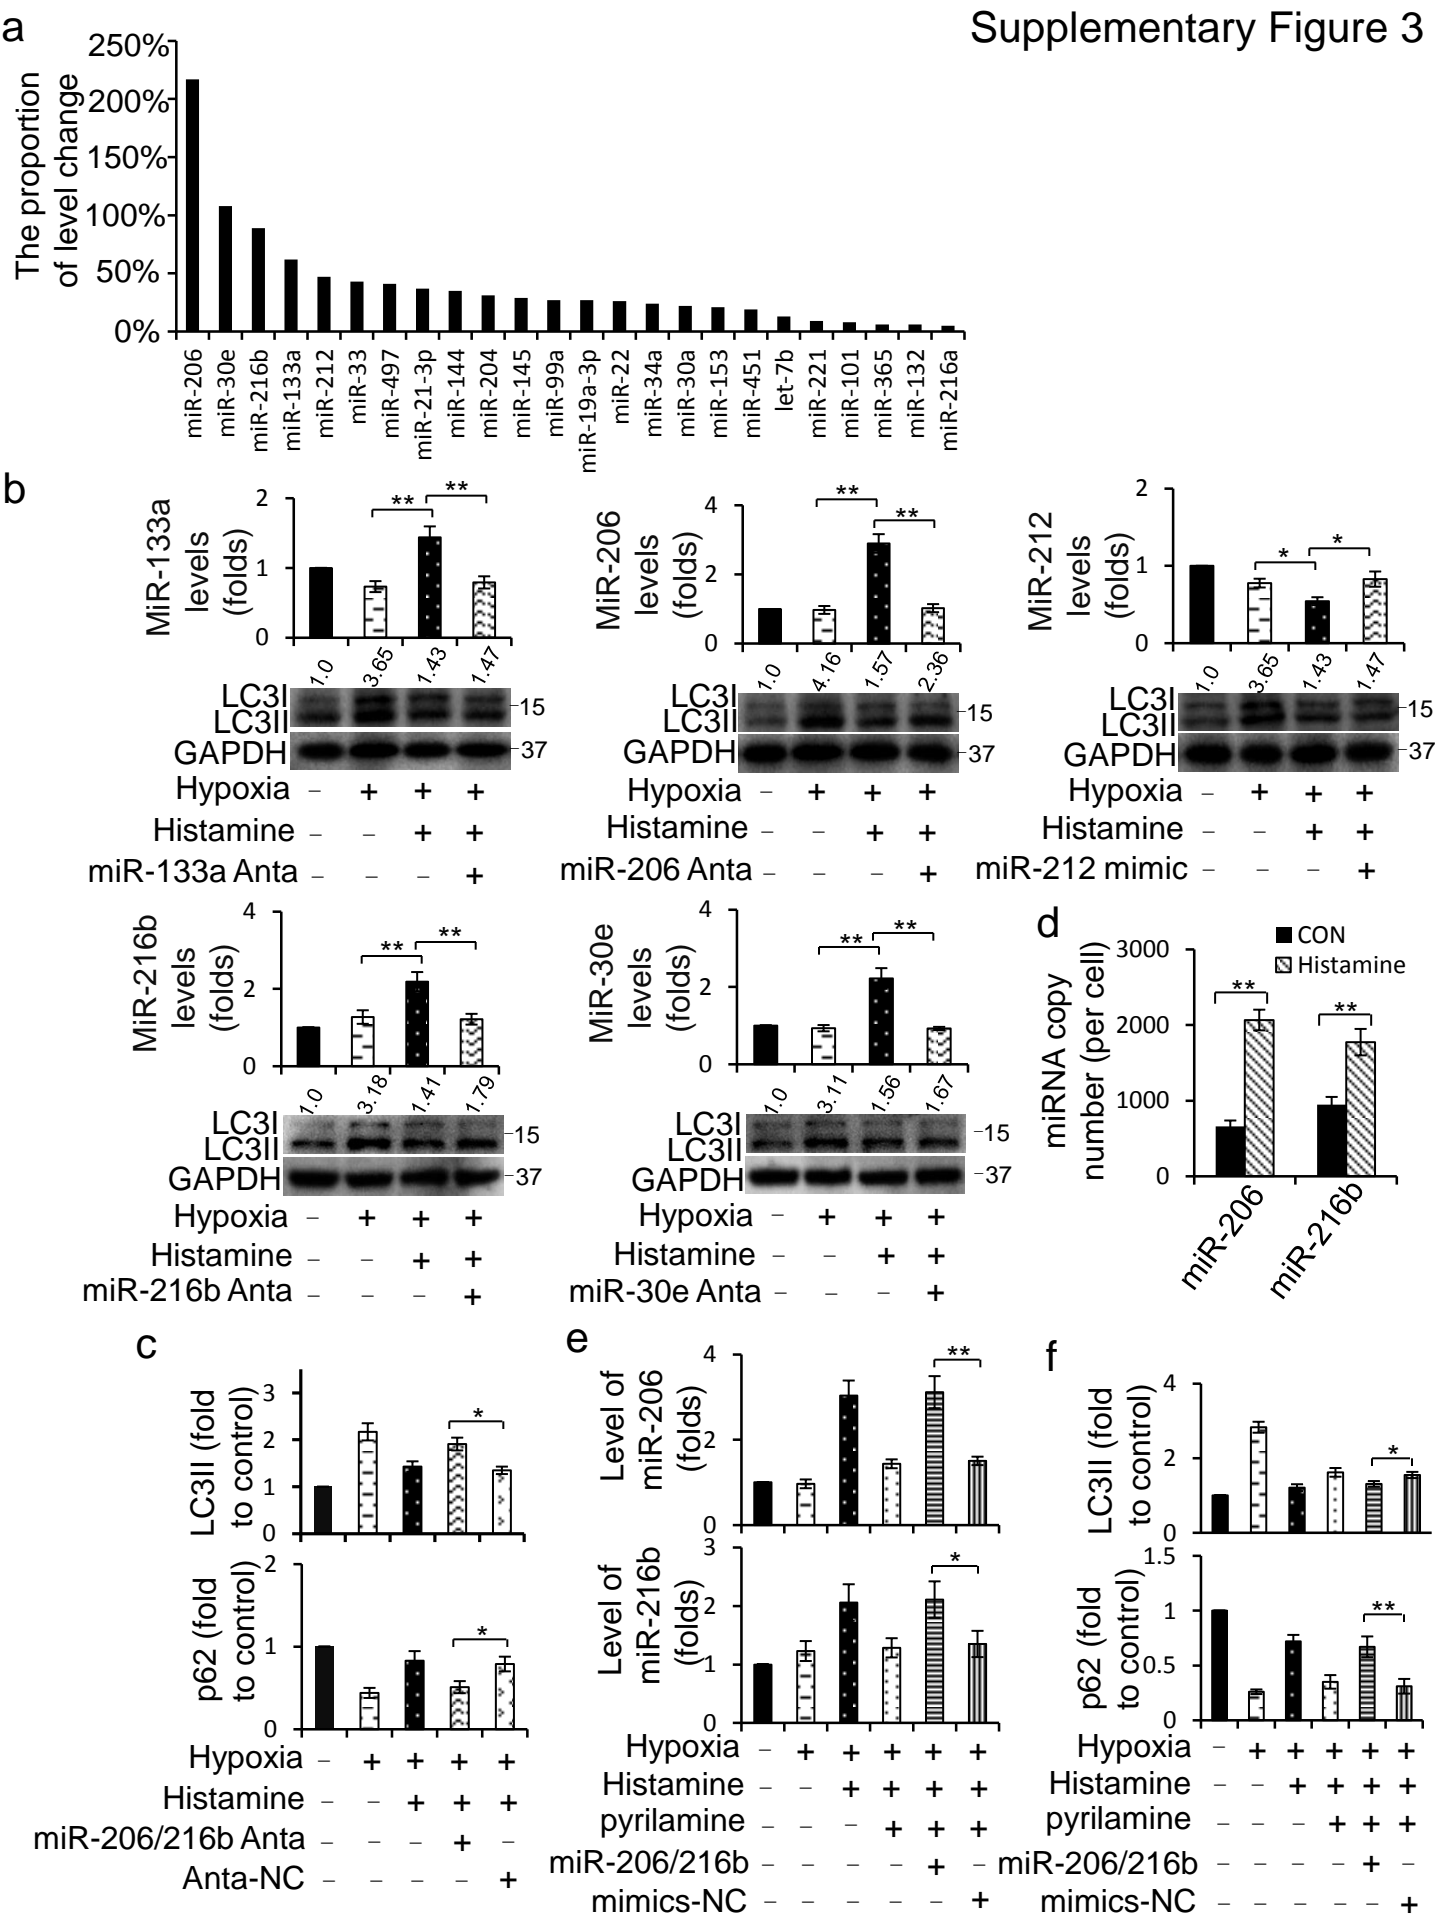

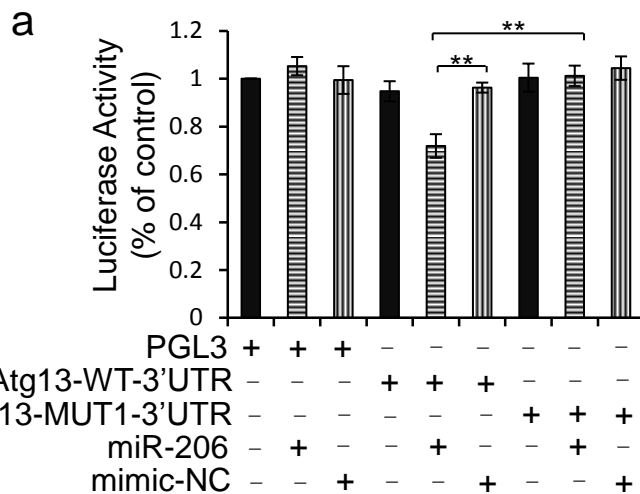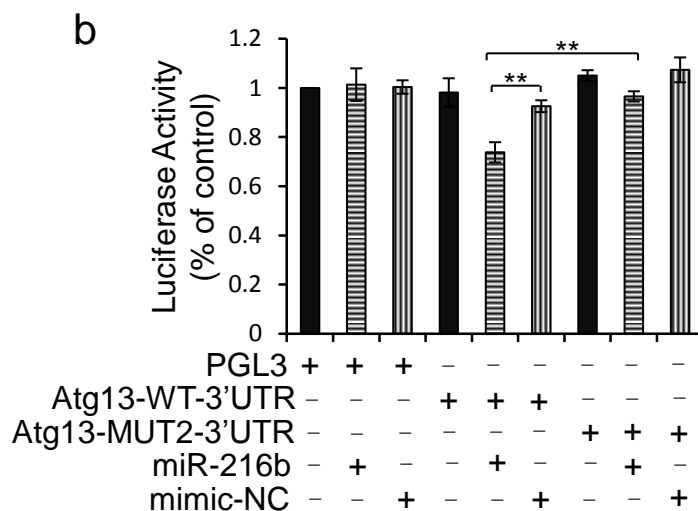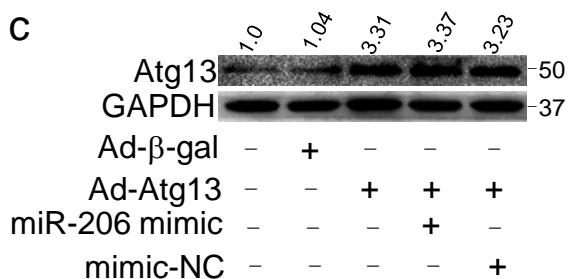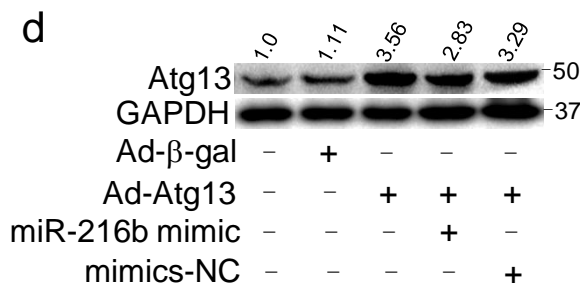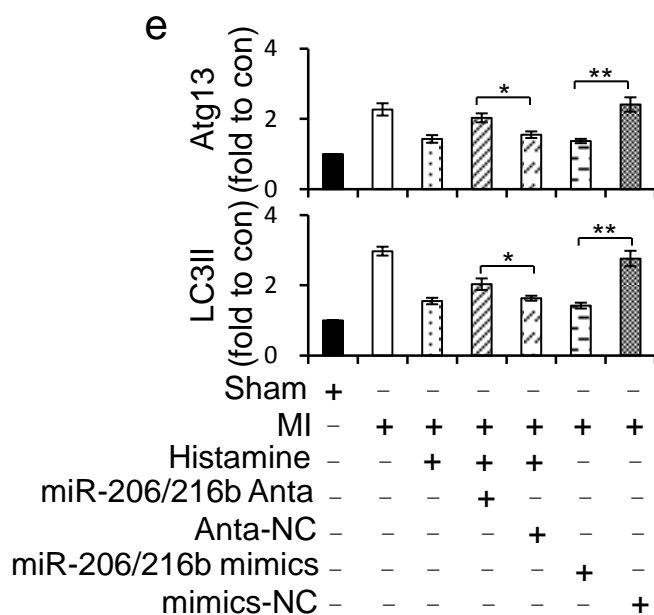

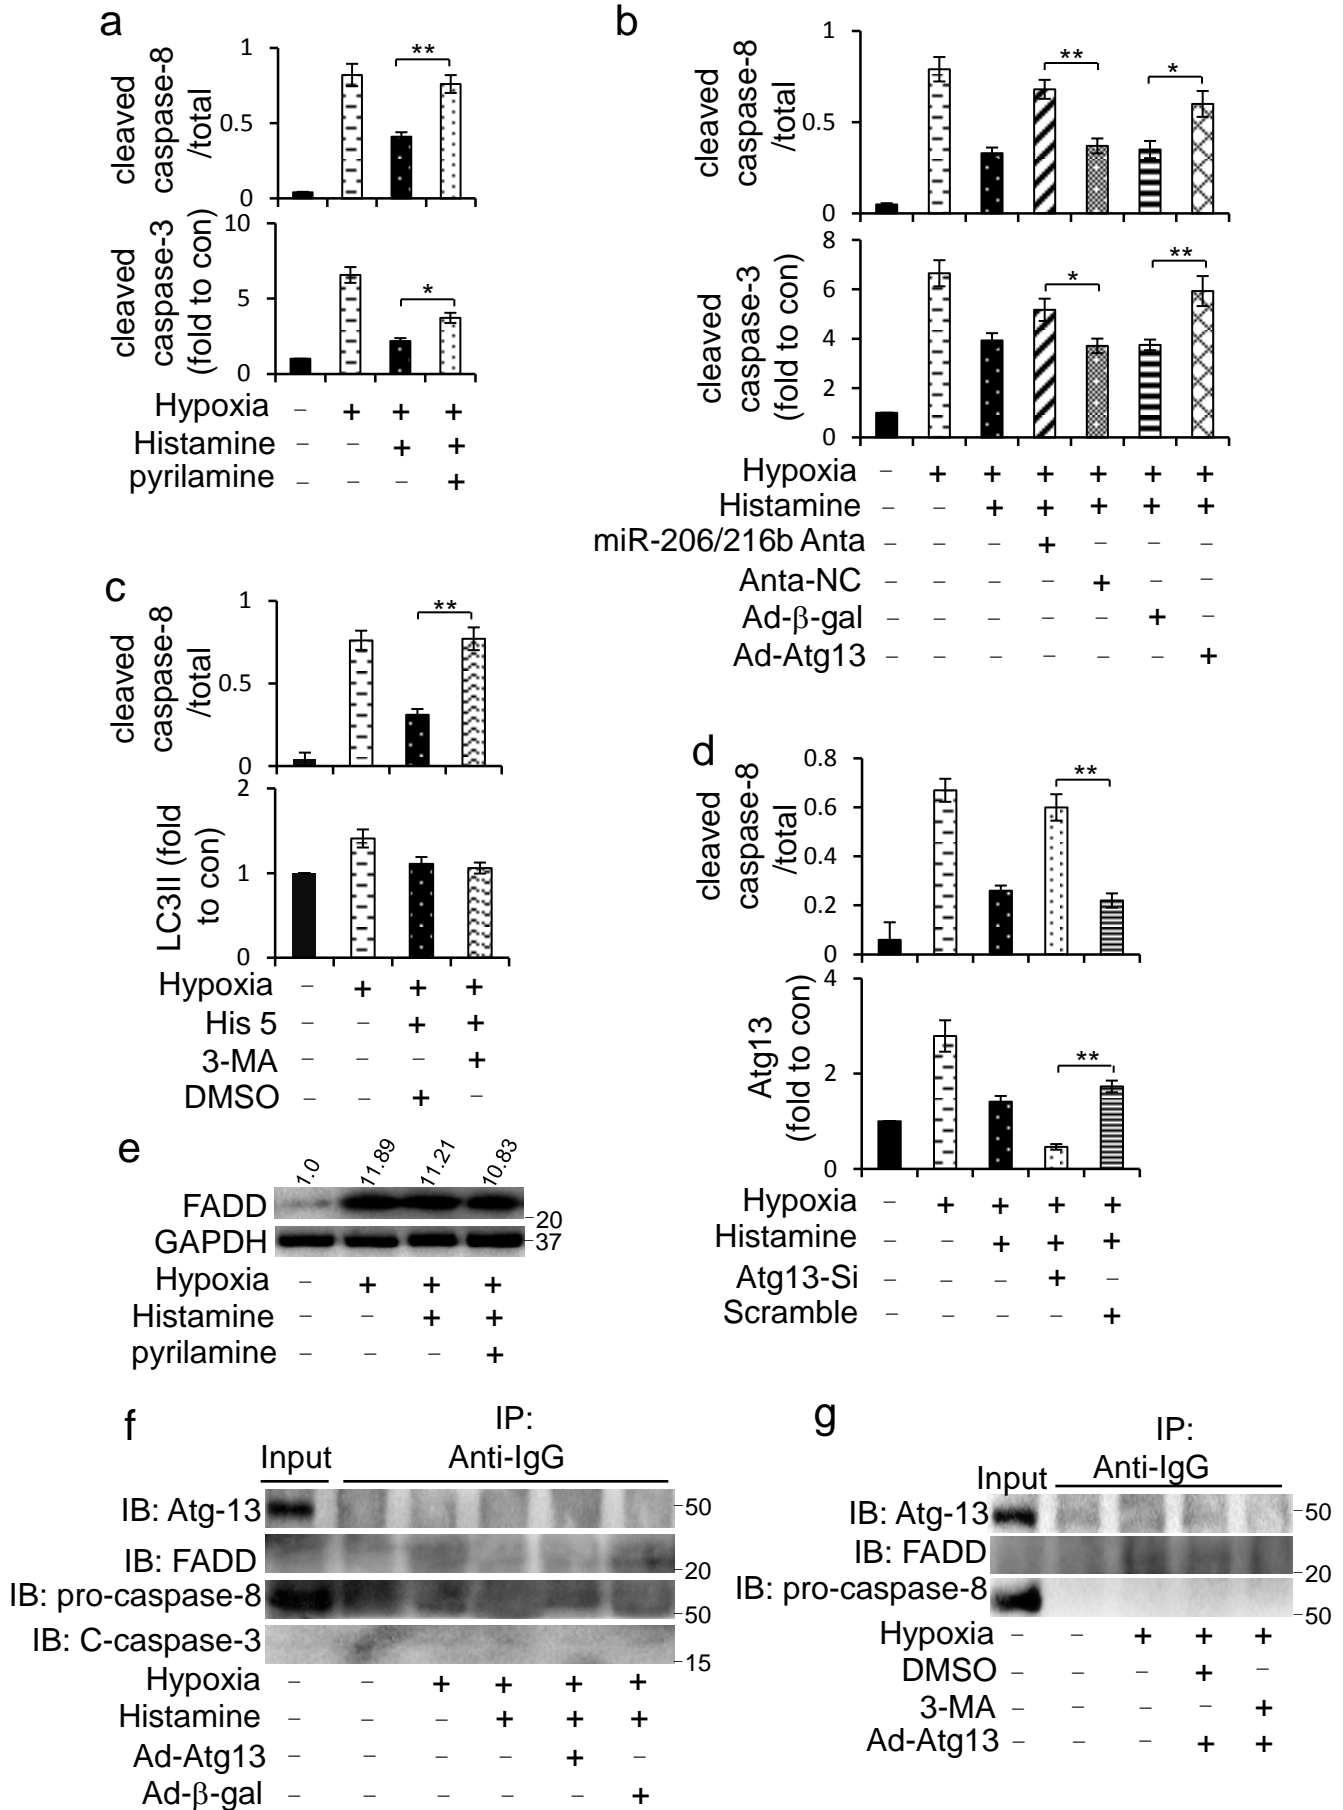

h

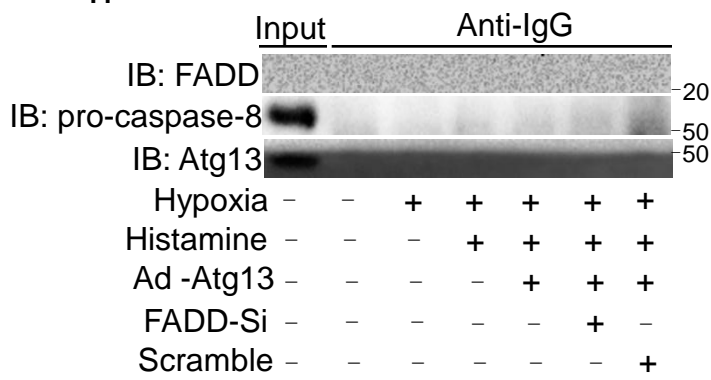

j

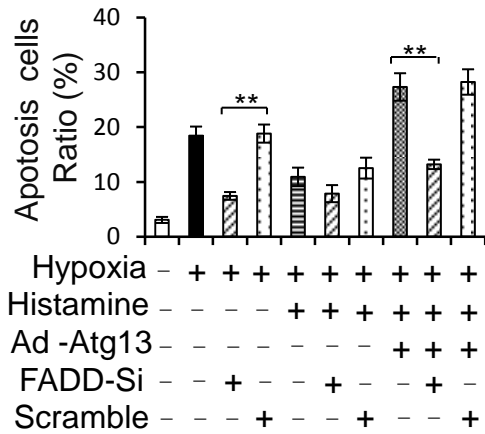

i

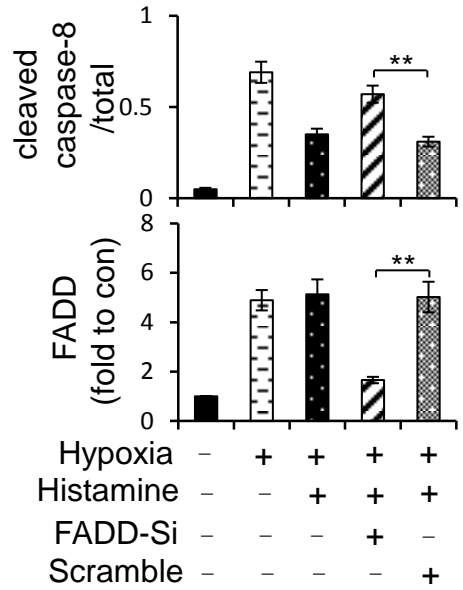

k

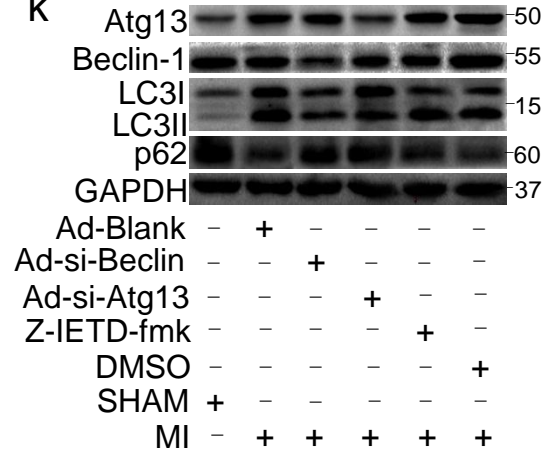

l

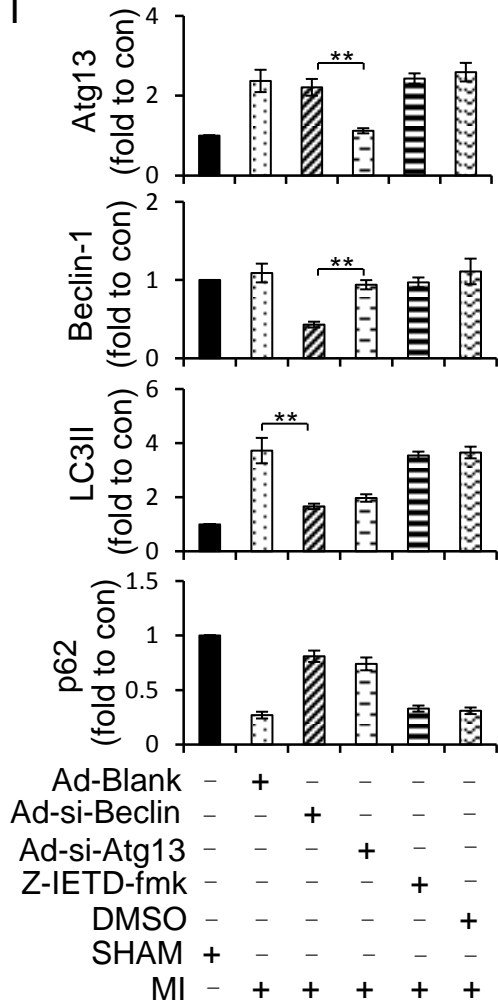

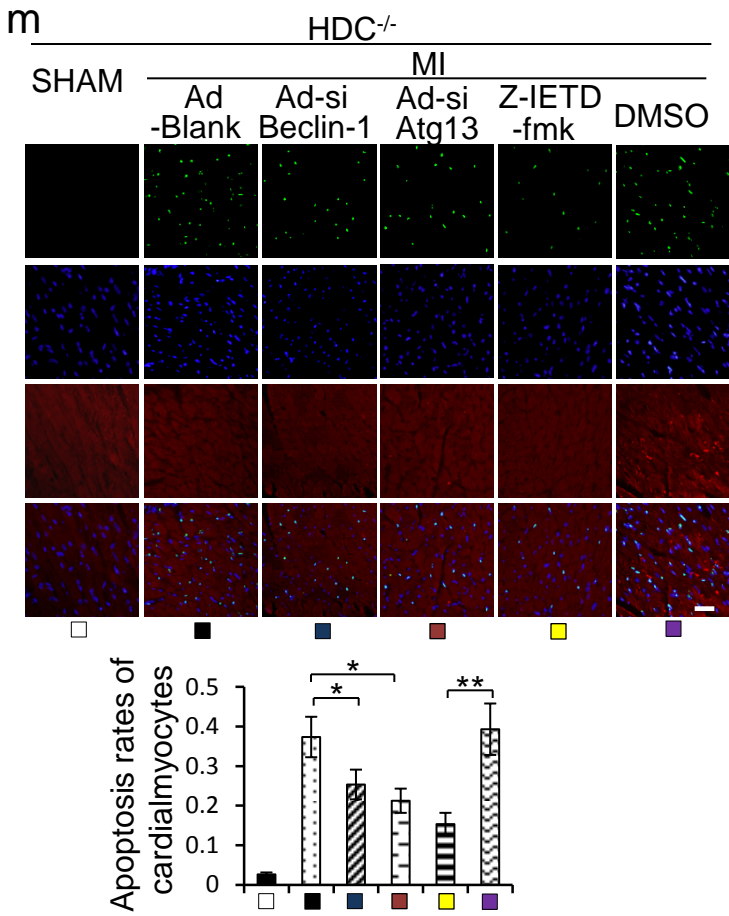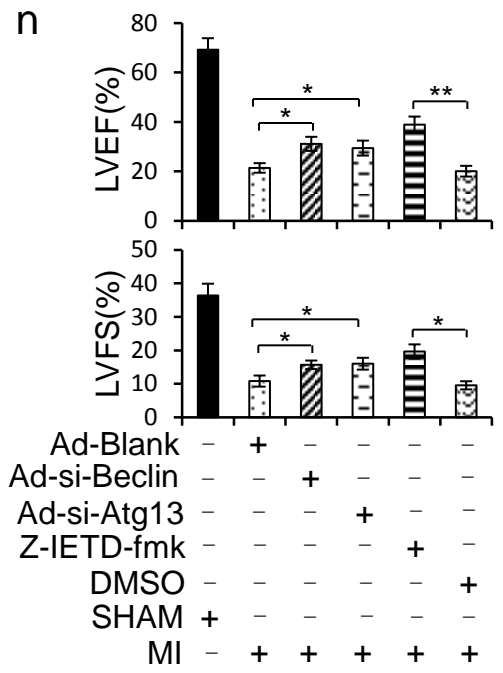

Supplement: 41419_2018_723_MOESM1_ESM.pdf [file 41419_2018_723_MOESM1_ESM.pdf]
