# Supplementary material for: Histamine deficiency aggravates cardiac injury through miR-206/216b-Atg13 axis-mediated autophagic-dependant apoptosis
Source: PubMed Central journal article supplement (PMC5992227; doi:10.1038/s41419-018-0723-6), 2018-06-07
Supplement: 41419_2018_723_MOESM3_ESM.pdf [file 41419_2018_723_MOESM3_ESM.pdf]

**Supplementary Table 1: miRNAs are potential to function in cardiac autophagy.**

| miRNAs     | Autophagic Targets                                 | Reference      |
|------------|----------------------------------------------------|----------------|
| let-7b     | caspase-3                                          | 1, 2           |
| miR-101    | Ras-related protein Rab-5A                         | 3              |
| miR-132    | FoxO3 transcription factor                         | 4              |
| miR-133a   | unidentified                                       | 5              |
| miR-144    | unidentified                                       | 6              |
| miR-145    | fibroblast growth factor receptor substrate 2      | 7              |
| miR-153    | myeloid cell leukemia-1                            | 8              |
| miR-19a-3p | epithelial mesenchymal transition                  | 9              |
| miR-204    | LC3-II                                             | 10             |
| miR-206    | unidentified                                       | 11             |
| miR-212    | FoxO3 transcription factor                         | 12             |
| miR-21-3p  | SH3 domain-containing protein 2                    | 4              |
| miR-216a   | Beclin1                                            | 13             |
| miR-216b   | Beclin1                                            | 14, 15, 16, 17 |
| miR-22     | p38 $\alpha$                                       | 18             |
| miR-221    | cyclin-dependent kinase (CDK) inhibitor p27; Ddit4 | 19, 20, 21     |
| miR-30a    | Beclin-1                                           | 22, 23, 24     |
| miR-30e    | Beclin-1                                           | 25             |
| miR-33     | unidentified                                       | 26             |
| miR-34a    | ATG9A                                              | 27             |
| miR-365    | Skp2                                               | 28             |
| miR-451    | tuberous sclerosis complex 1                       | 29             |
| miR-497    | unidentified                                       | 30             |
| miR-99a    | unidentified                                       | 31             |

**Reference:**

1. Ham O, et al. let-7b suppresses apoptosis and autophagy of human mesenchymal stem cells transplanted into ischemia/reperfusion injured heart 7by targeting caspase-3. *Stem Cell Research & Therapy* 2015, **6**(1): 1-11.
2. Cheng J, Zhang P, Jiang H. Let-7b-mediated pro-survival of transplanted mesenchymal stem cells for cardiac regeneration. *Stem Cell Research & Therapy* 2015, **6**(1): 1-3.
3. Wu D, Jiang H, Chen S, Zhang H. Inhibition of microRNA-101 attenuates hypoxia/reoxygenation - induced apoptosis through induction of autophagy in H9c2 cardiomyocytes. *Molecular Medicine Reports* 2015, **11**(5): 3988.
4. A U, et al. The miRNA-212/132 family regulates both cardiac hypertrophy and cardiomyocyte autophagy. *Nature Communications* 2012, **3**(3): 1078.

5. Nandi SS, et al. Induction of autophagy markers is associated with attenuation of miR-133a in diabetic heart failure patients undergoing mechanical unloading. *American Journal of Translational Research* 2015, **7**(4): 683-696.
6. Li J RS, et al. MicroRNA-144 is a circulating effector of remote ischemic preconditioning. *Basic Res Cardiol* 2014, **109**(5):423.
7. Kenshi H, et al. MicroRNA-145 repairs infarcted myocardium by accelerating cardiomyocyte autophagy. *American Journal of Physiology Heart & Circulatory Physiology* 2015, **309**(11): 1813-1826.
8. Zou Y, Liu W, Zhang J, Xiang D. miR-153 regulates apoptosis and autophagy of cardiomyocytes by targeting Mcl-1. *Molecular Medicine Reports* 2016, **14**(1): 1033.
9. Zou M, et al. Autophagy inhibition of hsa-miR-19a-3p/19b-3p by targeting TGF- $\beta$  R II during TGF- $\beta$ 1-induced fibrogenesis in human cardiac fibroblasts. *Scientific Reports* 2016, **6**: 24747.
10. Xiao J, et al. MiR-204 regulates cardiomyocyte autophagy induced by ischemia-reperfusion through LC3-II. *Journal of Biomedical Science* 2011, **18**(1): 35.
11. Yang Y, et al. miR-206 Mediates YAP-Induced Cardiac Hypertrophy and Survival. *Circulation Research* 2015, **117**(10): 891.
12. Lin SH, et al. Heme oxygenase-1 modulates microRNA expression in cultured astroglia: implications for chronic brain disorders. *Glia* 2015, **63**(7): 1270-1284.
13. Hui W, et al. miR-21-3p controls sepsis-associated cardiac dysfunction via regulating SORBS2. *Journal of Molecular & Cellular Cardiology* 2016, **94**: 43-53.
14. Menghini R, et al. MiR-216a: a link between endothelial dysfunction and autophagy. *Cell Death & Disease* 2014, **5**(1): e1029.
15. Xu X, et al. MicroRNA-216b/Beclin 1 axis regulates autophagy and apoptosis in human Tenon's capsule fibroblasts upon hydroxycamptothecin exposure. *Experimental Eye Research* 2014, **123**: 43-55.
16. Vacchi-Suzzi C, et al. Perturbation of microRNAs in rat heart during chronic doxorubicin treatment. *Plos One* 2012, **7**(7): e40395.
17. Yuan P, et al. The HIF-2 $\alpha$ -MALAT1-miR-216b axis regulates multi-drug resistance of hepatocellular carcinoma cells via modulating autophagy. *Biochem Biophys Res Commun* 2016, **478**(3): 1067-1073.
18. Kan C, Shi W. Autophagy regulates resistance of non-small cell lung cancer cells to paclitaxel.

*Tumor Biology* 2016, **37**(8): 1-6.

19. G L, et al. miR-22 regulates starvation-induced autophagy and apoptosis in cardiomyocytes by targeting p38 $\alpha$ . *Biochemical & Biophysical Research Communications* 2016, **478**(3): 1165-1172.
20. Su M, et al. MicroRNA-221 inhibits autophagy and promotes heart failure by modulating the p27/CDK2/mTOR axis. *Cell Death & Differentiation* 2015, **22**(6): 986-999.
21. Chen Q, Yue Z, Richards AM, Wang P. Up-regulation of miRNA-221 inhibits hypoxia/reoxygenation-induced autophagy through the DDIT4/mTORC1 and Tp53inp1/p62 pathways. *Biochemical & Biophysical Research Communications* 2016, **474**(1): 168-174.
22. Huang J, Huang C, Luo Y, Liu S, Chen X. Role of MiR-30a in cardiomyocyte autophagy induced by Angiotensin II. *Journal of Renin-Angiotensin-Aldosterone System* 2015, **16**(1): 1.
23. Yang Y, et al. Exosomal transfer of miR-30a between cardiomyocytes regulates autophagy after hypoxia. *Journal of Molecular Medicine* 2016, **94**(6): 1-14.
24. Pan W, et al. MiR-30-Regulated Autophagy Mediates Angiotensin II-Induced Myocardial Hypertrophy. *Plos One* 2013, **8**(1): e53950.
25. Lai L, et al. MiRNA-30e mediated cardioprotection of ACE2 in rats with Doxorubicin-induced heart failure through inhibiting cardiomyocytes autophagy. *Life Sciences* 2017, **169**: 69.
26. Ouimet M, et al. Mycobacterium tuberculosis induces the miR-33 locus to reprogram autophagy and host lipid metabolism. *Nature Immunology* 2016.
27. Huang J, et al. miR-34a Modulates Angiotensin II-Induced Myocardial Hypertrophy by Direct Inhibition of ATG9A Expression and Autophagic Activity. *Plos One* 2014, **9**(4): e94382.
28. Wu H, Wang Y, Wang X, Li R, Yin D. MicroRNA-365 accelerates cardiac hypertrophy by inhibiting autophagy via the modulation of Skp2 expression. *Biochemical & Biophysical Research Communications* 2017, **484**(2): 304-310.
29. Song L, et al. MiR-451 is decreased in hypertrophic cardiomyopathy and regulates autophagy by targeting TSC1. *Journal of Cellular & Molecular Medicine* 2014, **18**(11): 2266-2274.
30. Li X, et al. Inhibition of microRNA-497 ameliorates anoxia/reoxygenation injury in cardiomyocytes by suppressing cell apoptosis and enhancing autophagy. *Oncotarget* 2015, **6**(22): 18829-18844.
31. Li Q, et al. Overexpression of microRNA-99a attenuates heart remodelling and improves cardiac performance after myocardial infarction. *Journal of Cellular & Molecular Medicine*

2014, **18**(5): 919-928.
